# Supplementary material for: One-Step Chemical Vapor Deposition Synthesis of 3D N-doped Carbon Nanotube/N-doped Graphene Hybrid Material on Nickel Foam
Source: PubMed Central journal article supplement (PMC6164574; doi:10.3390/nano8090700), 2018-09-07
Supplement: nanomaterials-08-00700-s001.pdf [file nanomaterials-08-00700-s001.pdf]

# Supporting Information

**Table S1.** Atomic composition of N-CNTs/N-graphene.

| Sample     | C     | N     | O    |
|------------|-------|-------|------|
| atomic (%) | 84.53 | 12.37 | 3.09 |

**Table S2.** Different bonding configurations of N in N-CNTs/N-graphene.

| Sample (%) | Graphitic-N | Pyridinic-N | Pyrrolic-N |
|------------|-------------|-------------|------------|
|            | 14.3        | 68.7        | 16.9       |

## Different mass ratios between NF and melamine for fabricating uniform N-CNTs/N-graphene

To obtain uniform N-CNTs growth in this study, we carried out experiments by using different mass ratio between NF and melamine (1:1, 1:5, 1:10), as displayed in the following Figure S3. When using 1:1, only a small quantity of N-doped CNTs were observed, as indicated in the SEM image of Figure S3a, revealing that low content melamine will produce the sparse N-doped CNTs in the resulting product that probably due to the insufficient carbon source from the pyrolysis of melamine. When the melamine content is increased to 1:5, uniform and dense N-doped CNT growth was fabricated, as shown in Figure S3b. As displayed in Figure S3c, non-uniform N-doped CNTs were observed when the mass ratio NF and melamine is increased to 1:10, which is probably due to the excess carbon content from the pyrolysis of melamine, resulting in the formation of Ni NPs with different size and eventually non-uniform growth of N-doped CNTs.

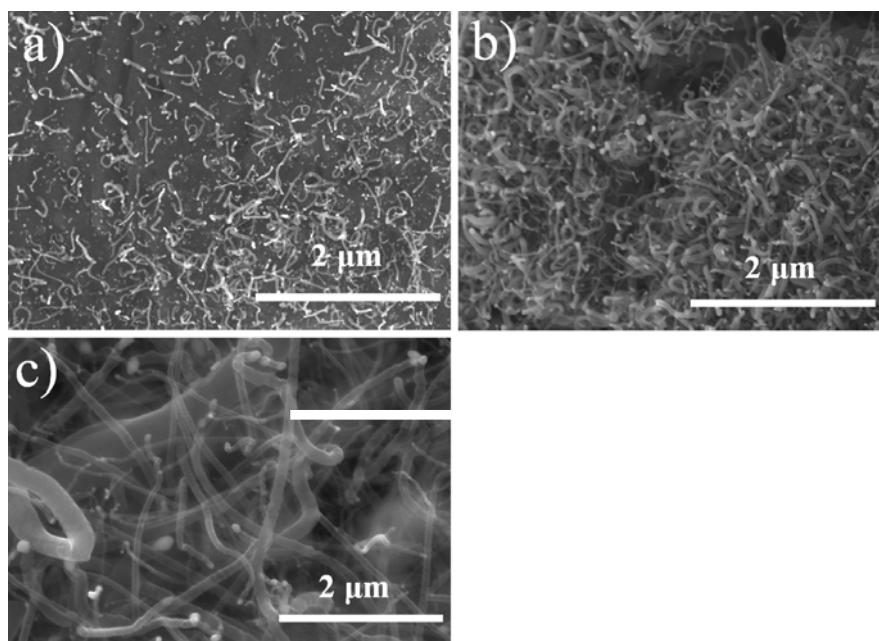

**Figure S1.** (a), (b) and (c) SEM image of N-doped CNTs by using different mass ratio of NF and melamine.

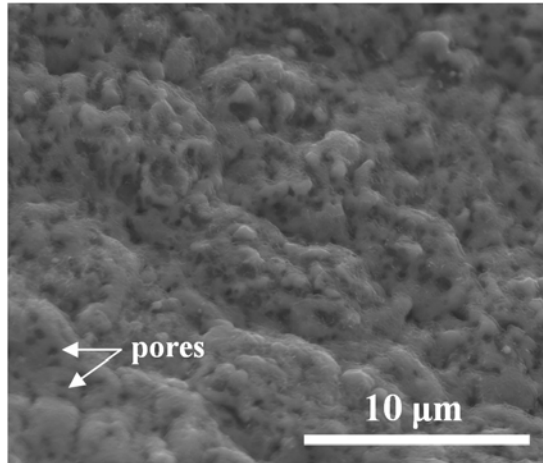

**Figure S2.** SEM image of melamine on NF at 400 °C.

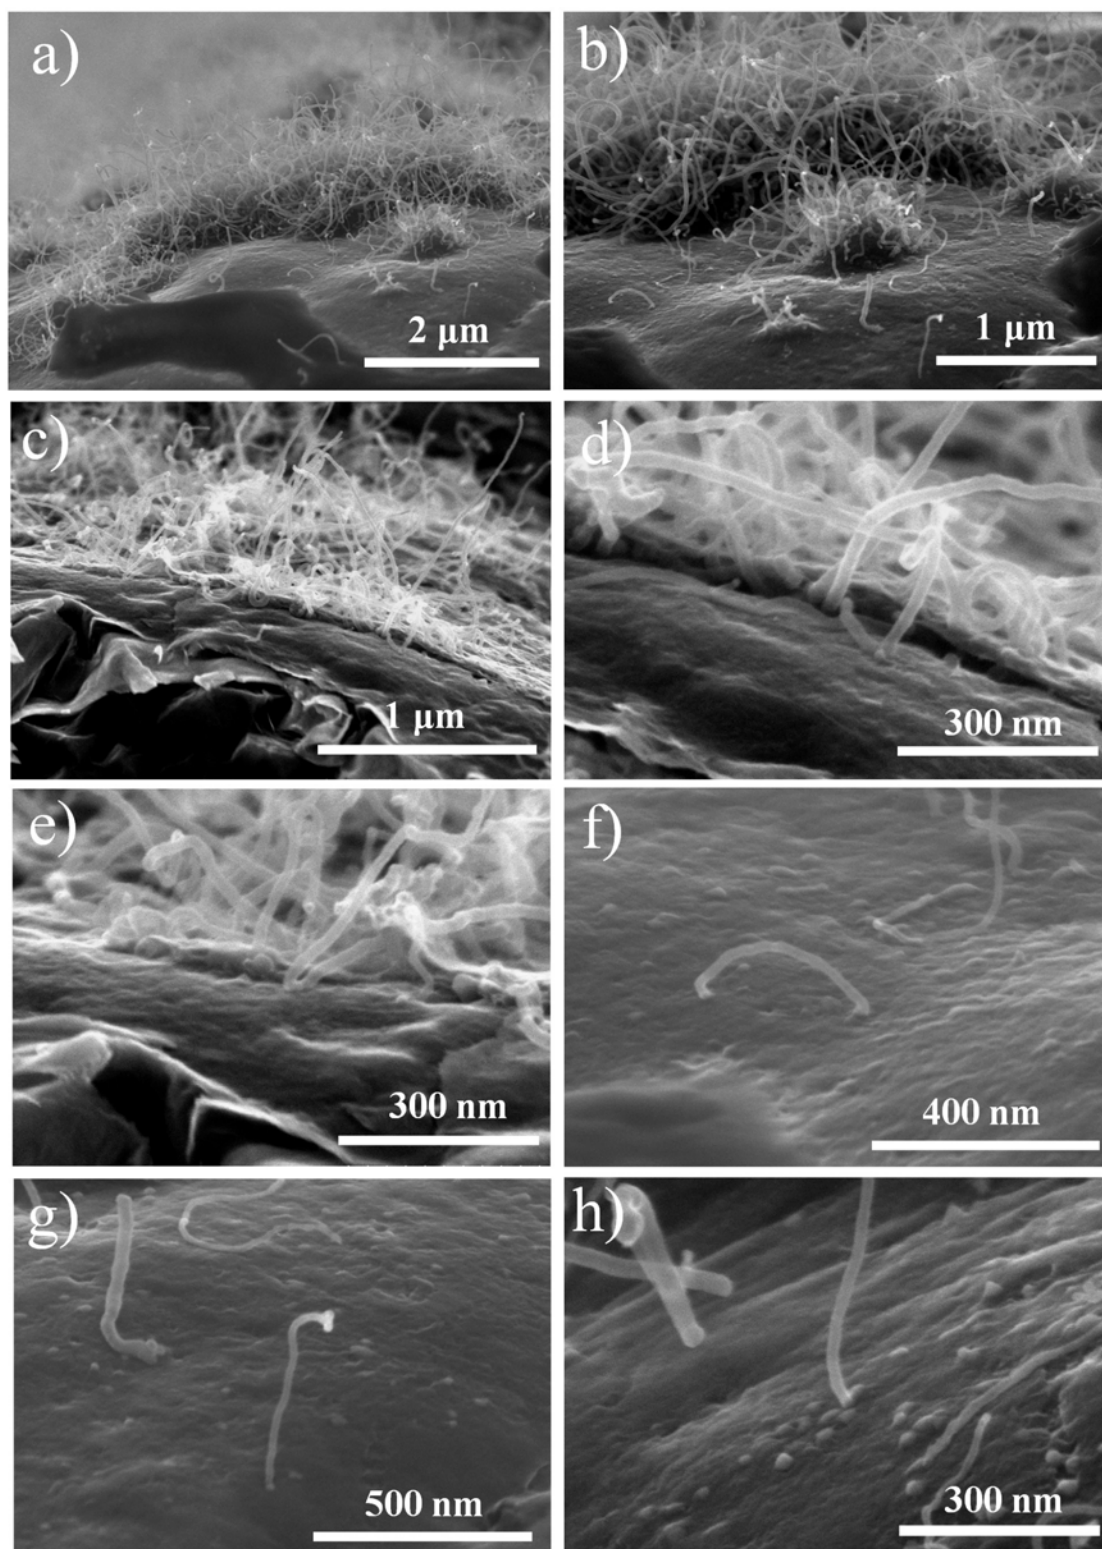

**Figure S3.** (a–h) high-magnification SEM images showing the integration between CNTs and graphene in different spots of samples.

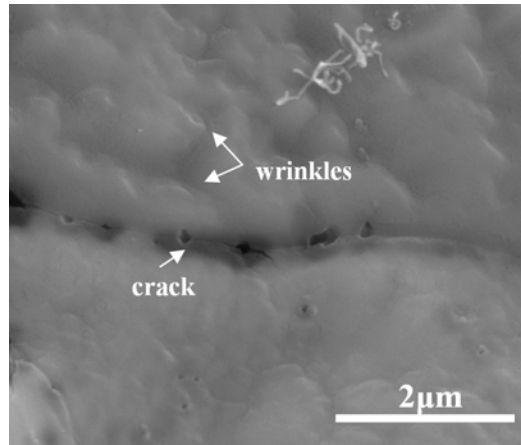

**Figure S4.** High-magnification SEM image of graphene sheet on NF.

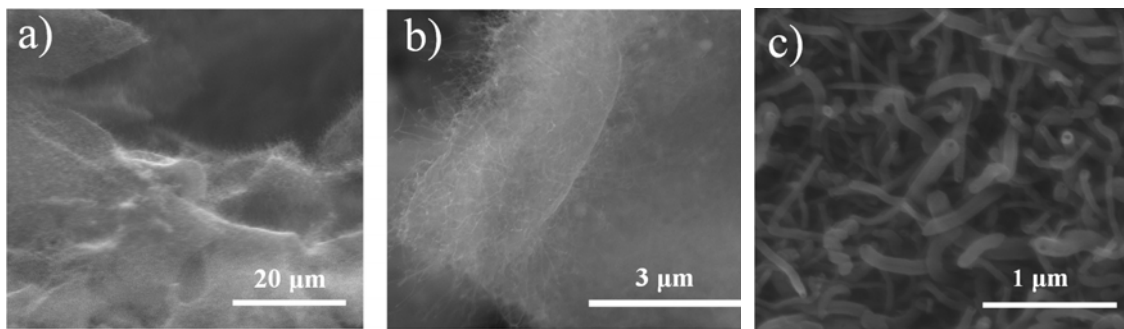

**Figure S5.** (a), (b), and (c) Low-magnification and high-magnification SEM images of sample after removing NF.
